# Supplementary material for: An efficient approach to prepare ether and amide-based self-catalyzed phthalonitrile resins
Source: Royal Society of Chemistry journal article supplement (doi:10.1039/c3py00237c), 2013-01-01
Supplement: c3py00237c.pdf [file c3py00237c.pdf]

# An Efficient Approach to Prepare Ether and Amide-Based Self Catalyzed Phthalonitrile Resins

Amir Badshah<sup>1,2</sup>, Michael R. Kessler<sup>2</sup>, Zhou Heng<sup>3</sup> and Aurangzeb Hasan<sup>1,4\*</sup>

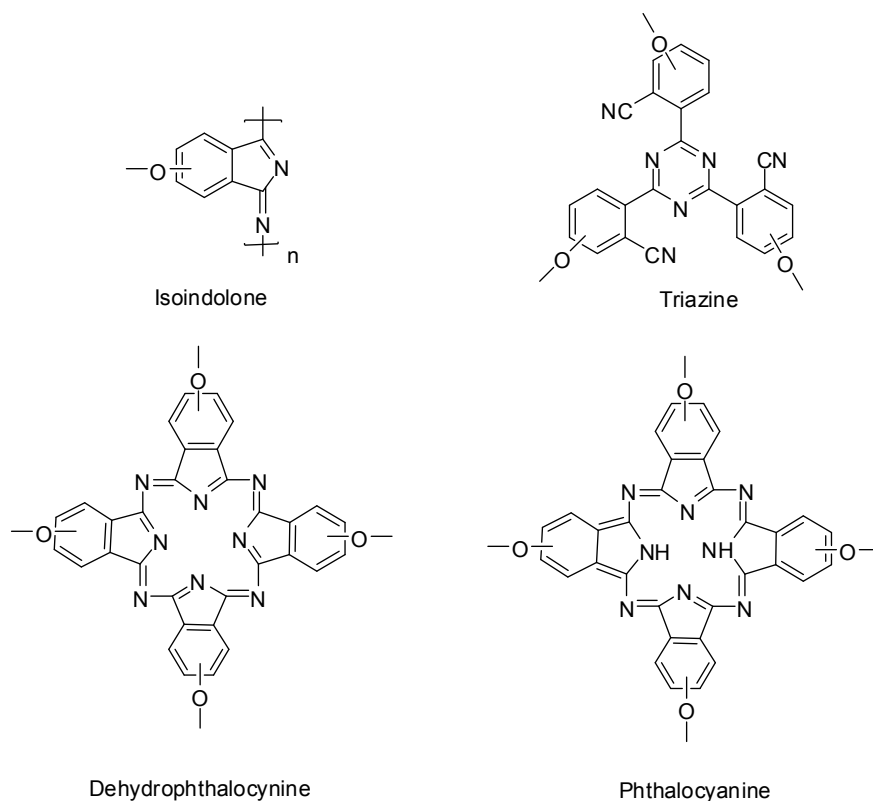

Figure i: Possible polymeric structures from phthalonitrile

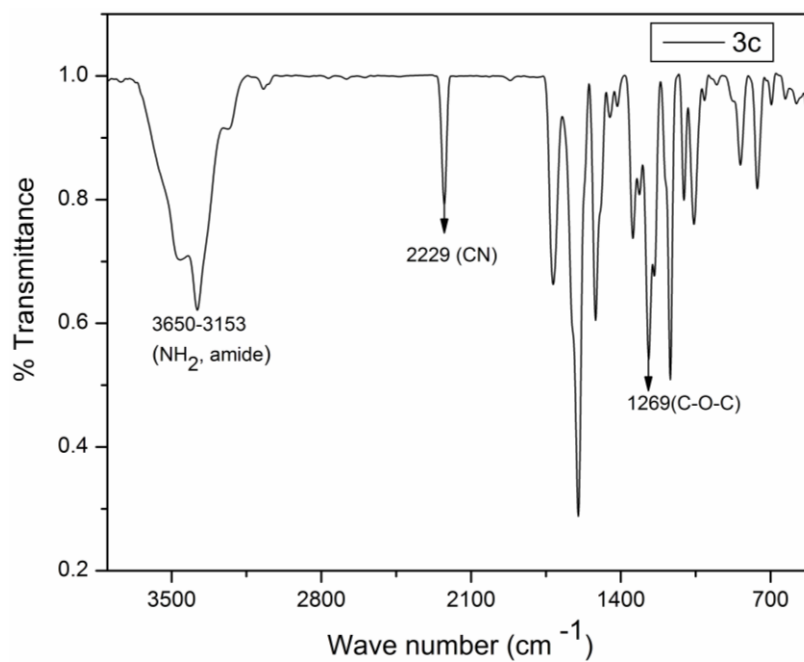

Figure ii: FT-IR Spectra of **3c** (monomer)

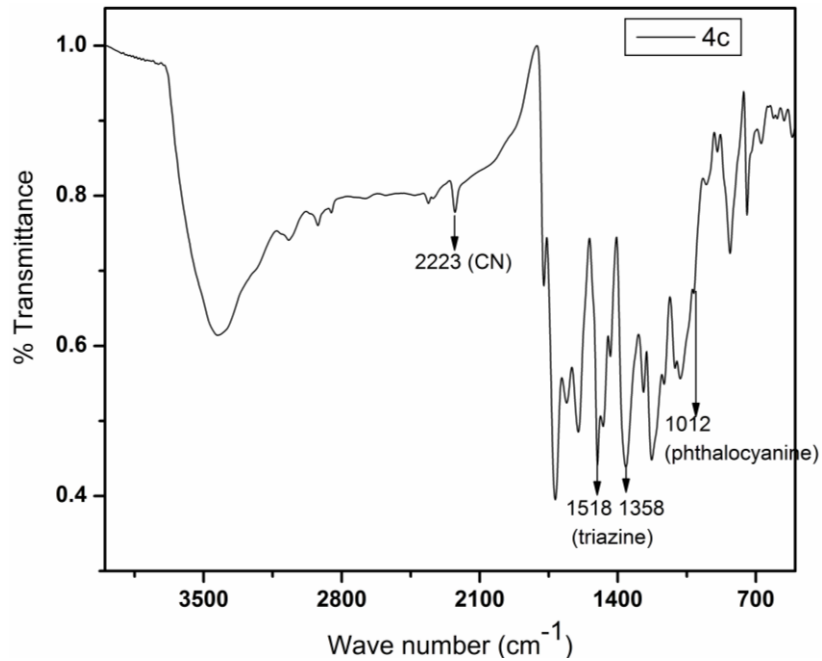

Figure iii: FT-IR Spectra of **4c** (polymer)

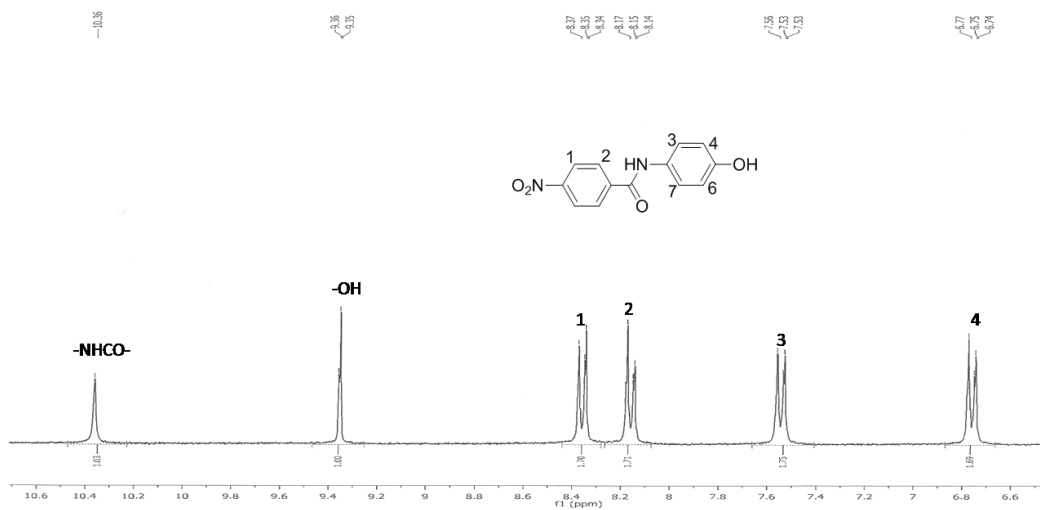

Figure iv:  $^1\text{H-NMR}$  Spectra of **1c**

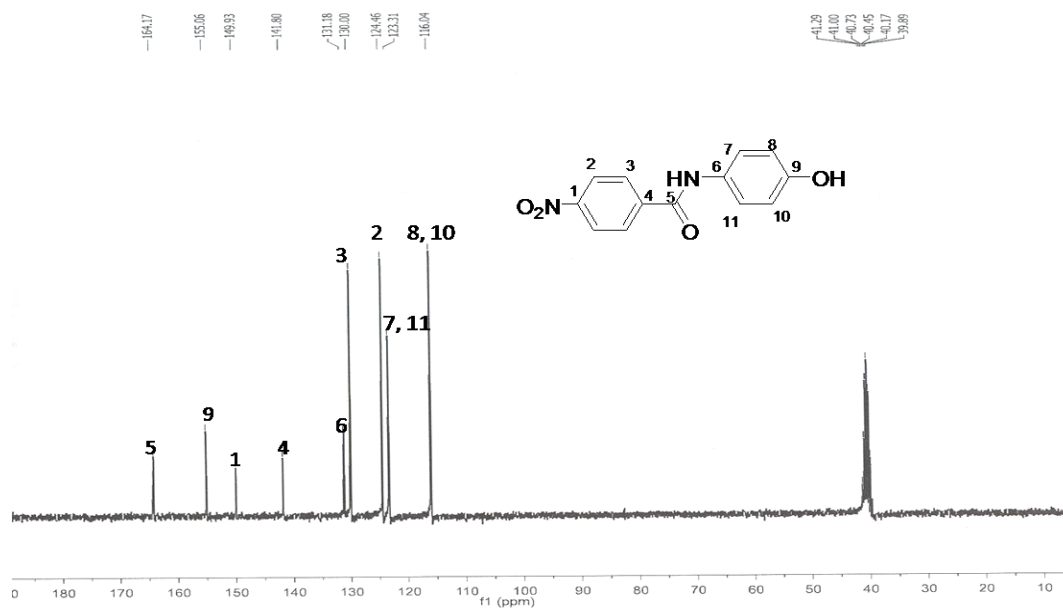

Figure v:  $^{13}\text{C-NMR}$  Spectra of **1c**

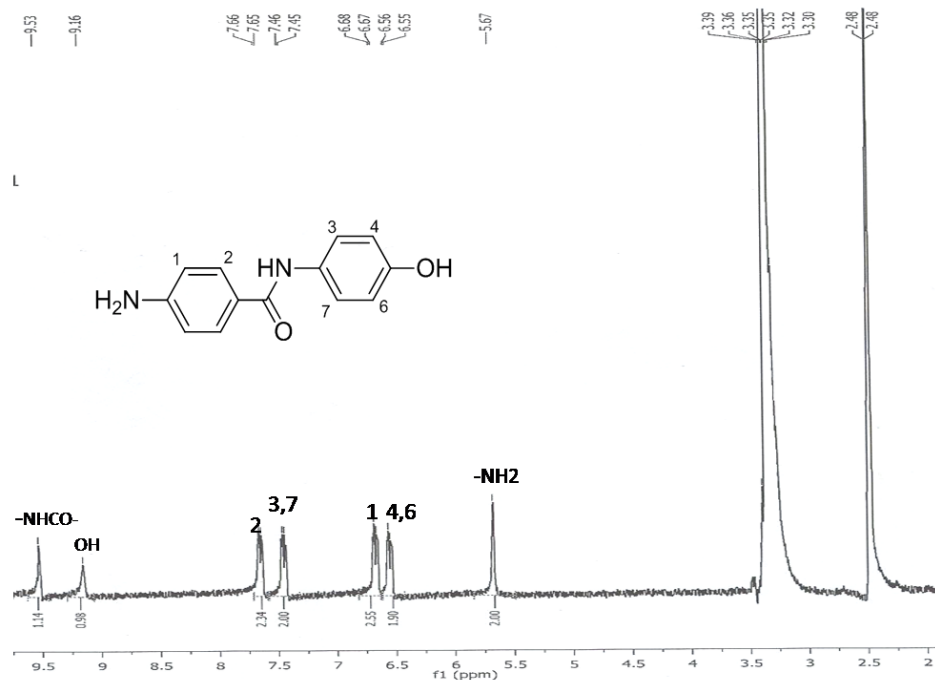

Figure vi:  $^1\text{H}$ -NMR Spectra of 2c

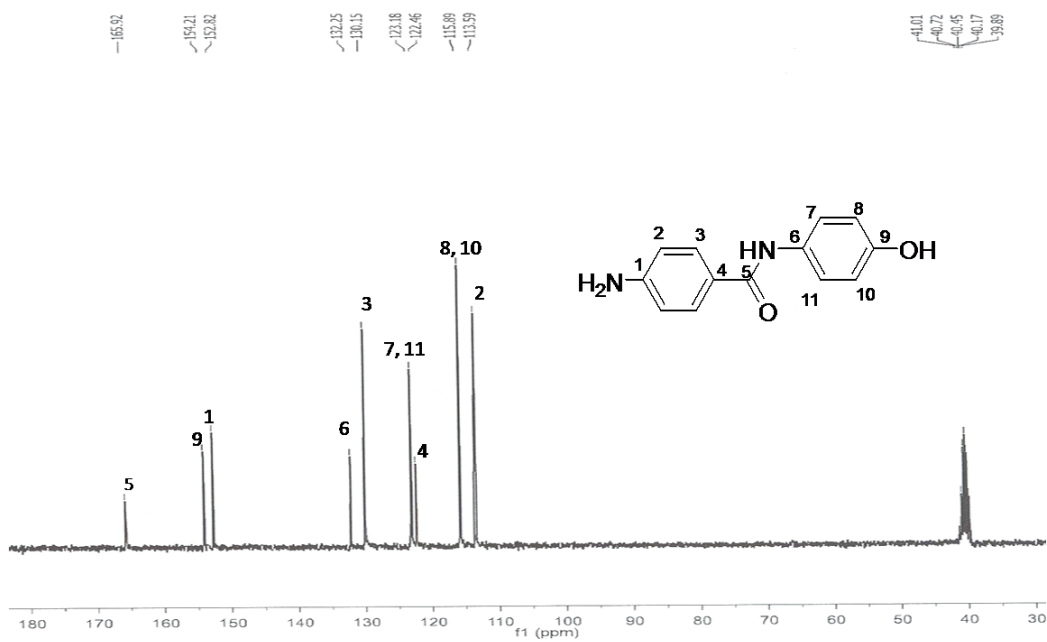

Figure vii:  $^{13}\text{C}$ -NMR Spectra of 2c

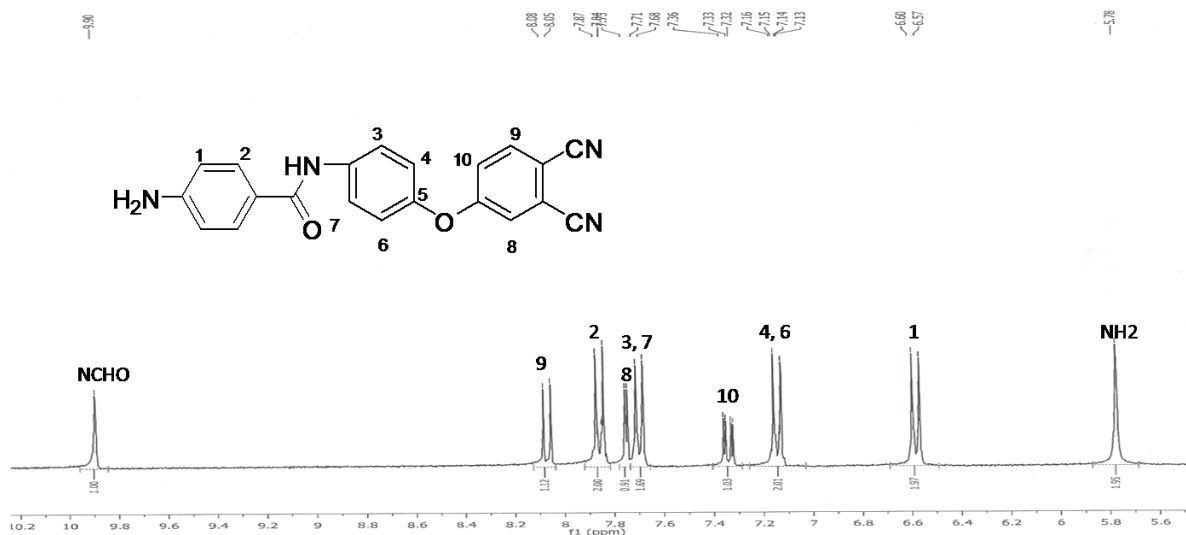

Figure viii: <sup>1</sup>H-NMR Spectra of **3c**

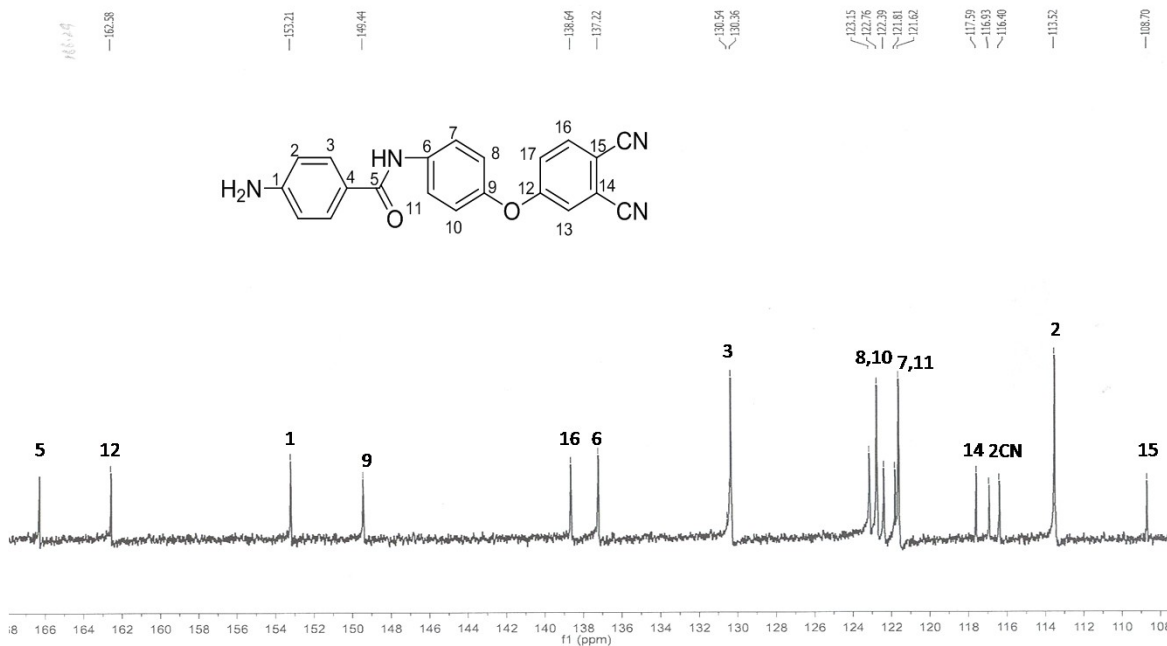

Figure ix: <sup>13</sup>C-NMR Spectra of **3c**
